# Supplementary material for: Ion conducting cholesterol appended pyridinium bisamide-based gel for the selective detection of Ag+and Cl−ions
Source: Royal Society of Chemistry journal article supplement (doi:10.1039/c3ra44718a), 2013-10-23
Supplement: c3ra44718a.pdf [file c3ra44718a.pdf]

## Supporting Information

### Ion conducting cholesterol appended pyridinium bis amide – based gel in the selective detection of $\text{Ag}^+$ and $\text{Cl}^-$ ions

Kumares Ghosh,<sup>\*a</sup> Debasis Kar,<sup>a</sup> Santanu Panja<sup>a</sup> and Subhratanu Bhattacharya<sup>b</sup>

Departments of Chemistry<sup>a</sup> and Physics<sup>b</sup>, University of Kalyani, Kalyani, Nadia-741235, India,

Email: ghosh\_k2003@yahoo.co.in, Fax: +91 33258282

#### 1. Change in emission of **1a** in $\text{CHCl}_3$ containing 0.2% DMSO.

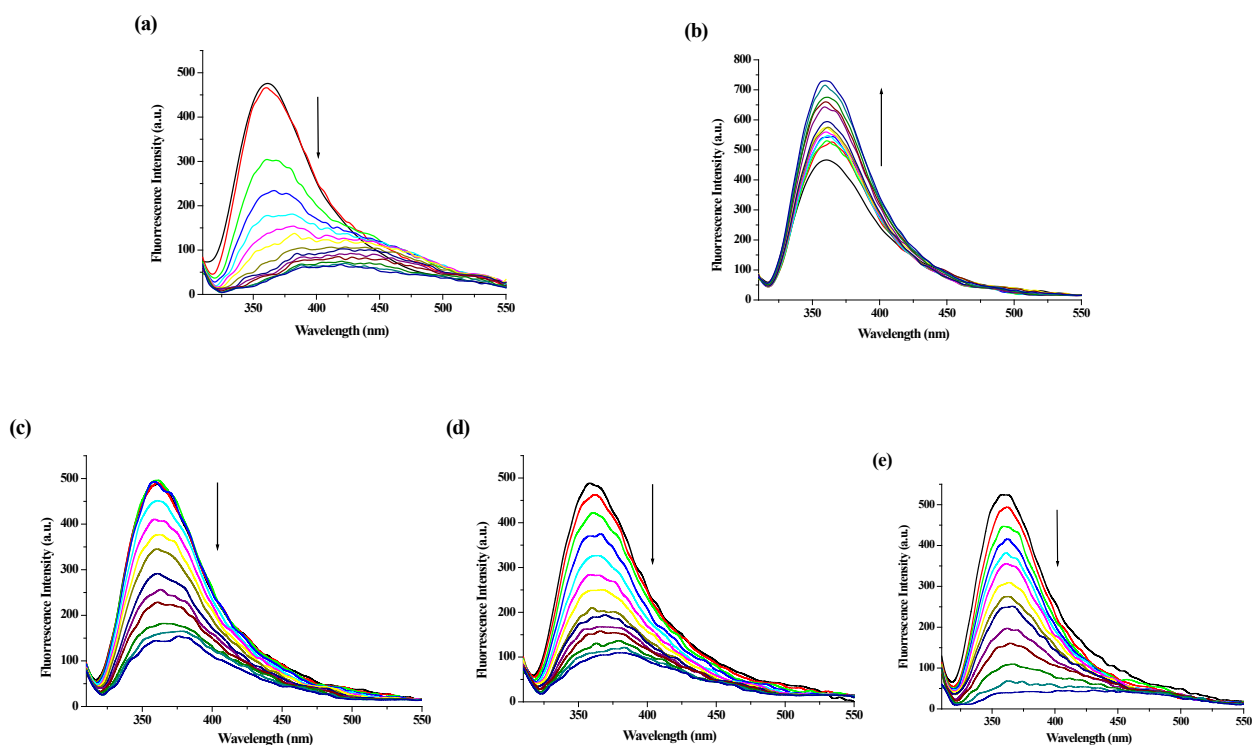

**Figure 1S.** Change in emission of **1a** ( $c = 2.25 \times 10^{-5}$  M) upon addition of (a)  $\text{F}^-$ , (b)  $\text{Cl}^-$ , (c)  $\text{Br}^-$ , (d)  $\text{I}^-$ , (e)  $\text{OH}^-$  in  $\text{CHCl}_3$  containing 0.2% DMSO [concentration of all anions =  $9.0 \times 10^{-4}$  M].

## 2. Change in absorbance of 1a in CHCl<sub>3</sub> containing 0.2% DMSO

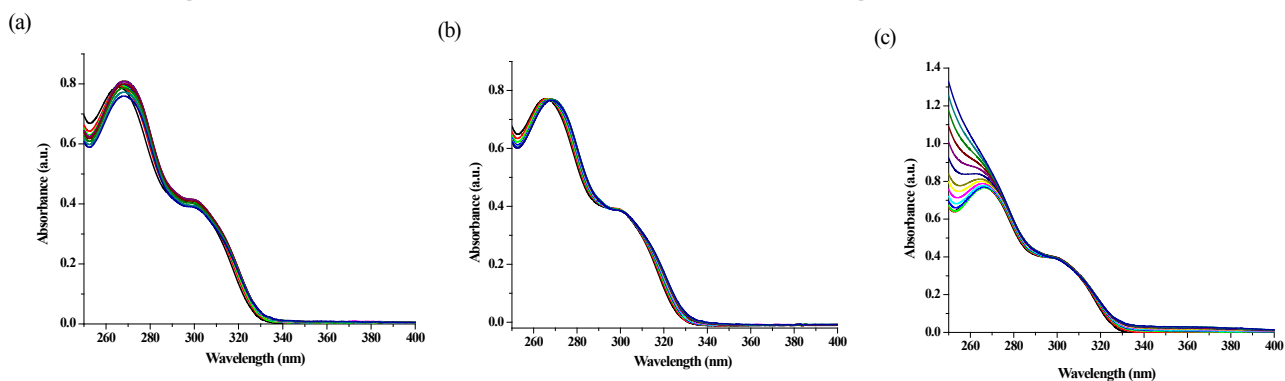

**Figure 2S.** Change in absorbance of **1a** ( $c = 2.25 \times 10^{-5}$  M) upon addition of 6 equivalent amounts of (a) Cl<sup>-</sup>, (b) Br<sup>-</sup> and (c) I<sup>-</sup> in CHCl<sub>3</sub> containing 0.2% DMSO [concentration of all anions =  $9.0 \times 10^{-4}$  M].

## 3. Change in absorbance of 1 in CHCl<sub>3</sub>

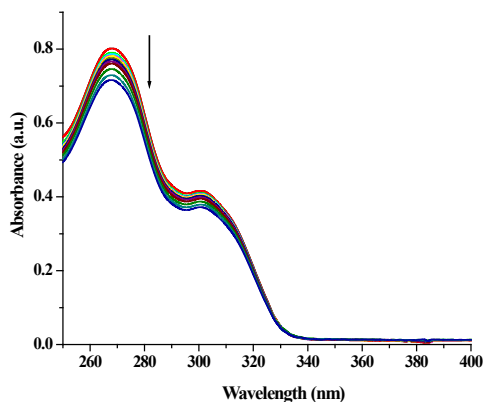

**Figure 3S.** Change in absorbance of **1** ( $c = 2.25 \times 10^{-5}$  M) upon addition of 6 equivalent amounts of Ag<sup>+</sup> ( $c = 9.0 \times 10^{-4}$  M) in CHCl<sub>3</sub>.

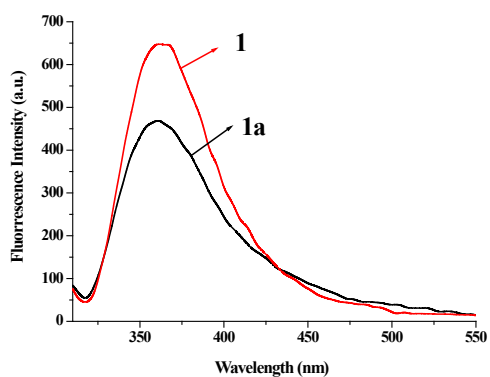

**Figure 4S.** Comparison of fluorescence emission spectra of **1** and **1a** ( $c = 2.25 \times 10^{-5}$  M) in  $\text{CHCl}_3$  containing 0.2% DMSO.

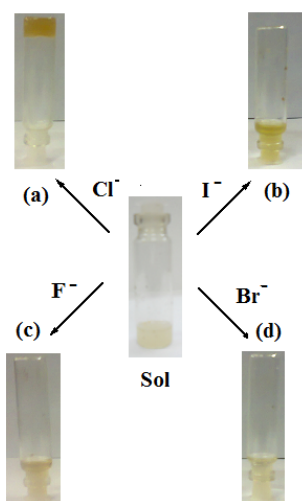

**Figure 5S.** Photographs showing the phase changes of **1a** ( $c = 8.03 \times 10^{-3}$  M) in  $\text{CHCl}_3$  upon addition of 2 equiv. amounts of (a) TBACl, (b) TBAI, (c) TBAF and (d) TBABr (concentration of all halides was  $2 \times 10^{-2}$  M).

#### 4. Binding constant curves.

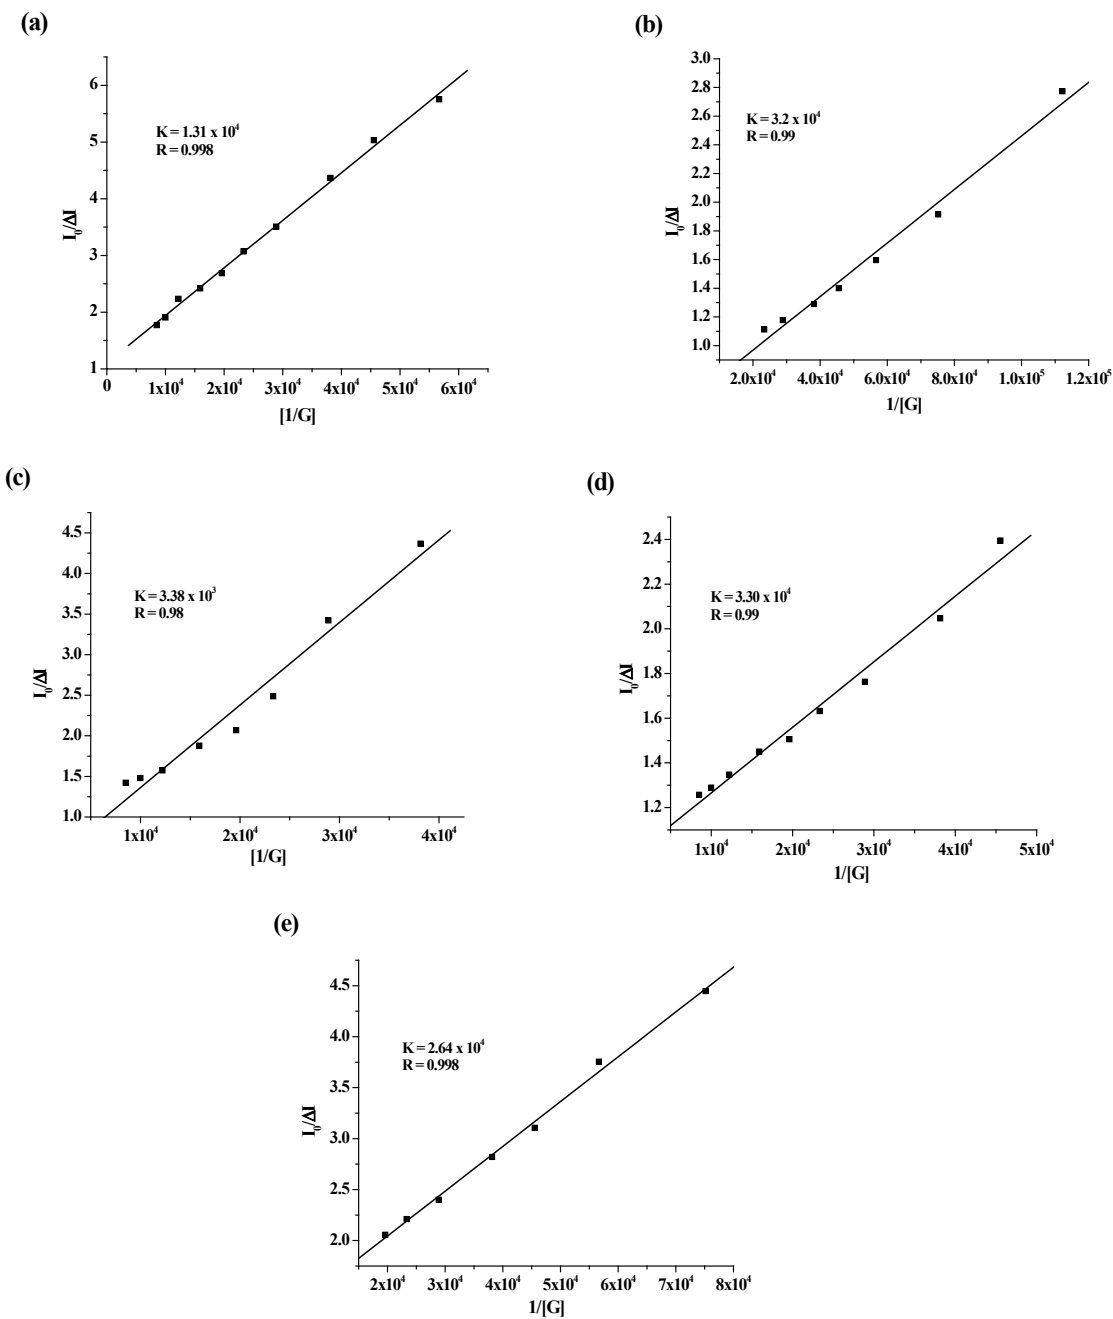

**Figure 6S.** Benesi–Hilderband plots for **1a** with (a)  $\text{Cl}^-$ , (b)  $\text{F}^-$ , (c)  $\text{Br}^-$ , (d)  $\text{I}^-$ , (e)  $\text{OH}^-$  ( $[\mathbf{1a}] = 2.25 \times 10^{-5} \text{ M}$ ) at 380 nm.

## 5. UV-VIS Job plot with $\text{Cl}^-$ and $\text{F}^-$ .

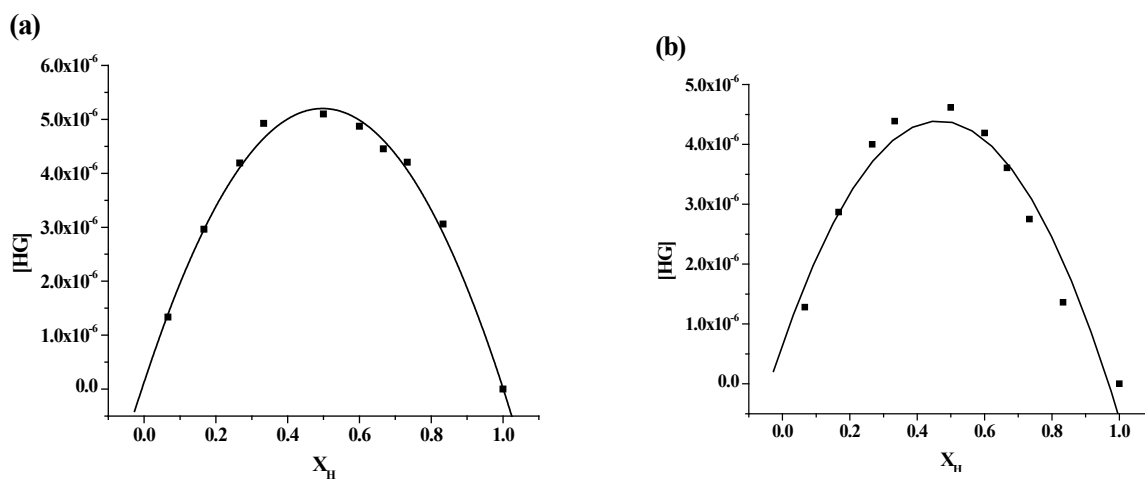

**Figure 7S.** Job plot of **1a** ( $c = 2.25 \times 10^{-5}$  M) with (a)  $\text{Cl}^-$  and (b)  $\text{F}^-$ .

## 6. $^1\text{H}$ NMR change with $\text{F}^-$ .

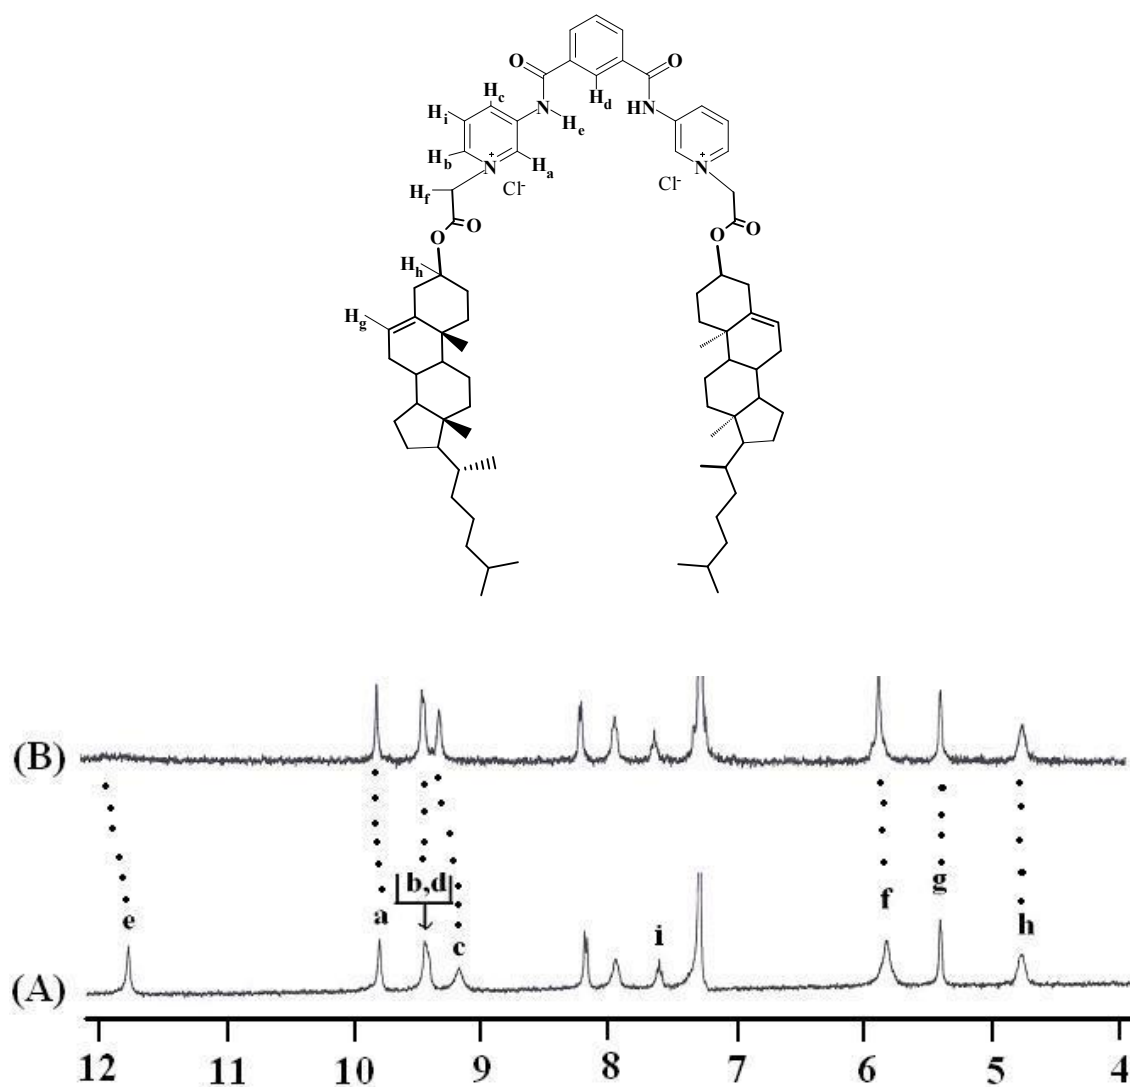

**Figure 8S:** Partial  $^1\text{H}$  NMR (400 MHz,  $\text{CDCl}_3$ ) of (A) compound **1** ( $c = 3.21 \times 10^{-3}$  M) and (B) **1** with TBAF (1:1) [Addition of more than 1 equiv. amount of TBAF gave no sharp signal for characterization.]

## 7. NMR change with OH<sup>-</sup>.

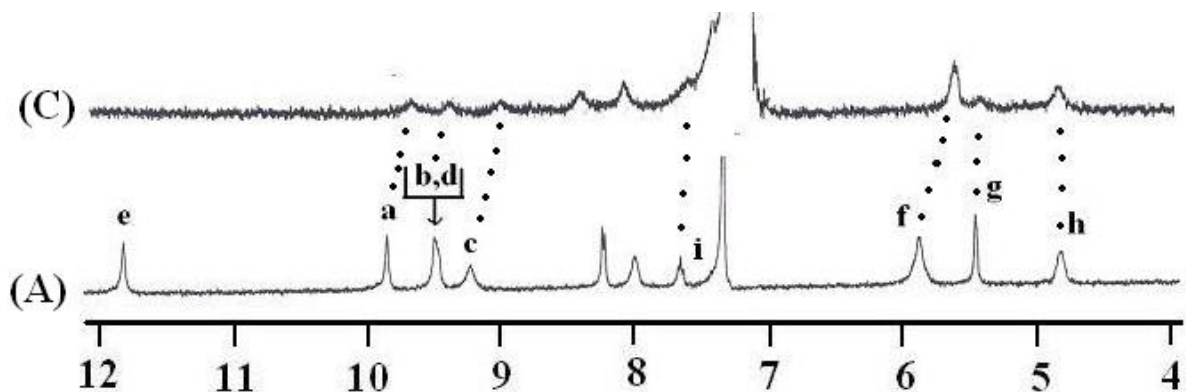

**Figure 9S.** Partial <sup>1</sup>H NMR (400 MHz, CDCl<sub>3</sub>) of (A) compound **1** ( $c = 3.21 \times 10^{-3}$  M) and (C) **1** with TBAOH (1:1).

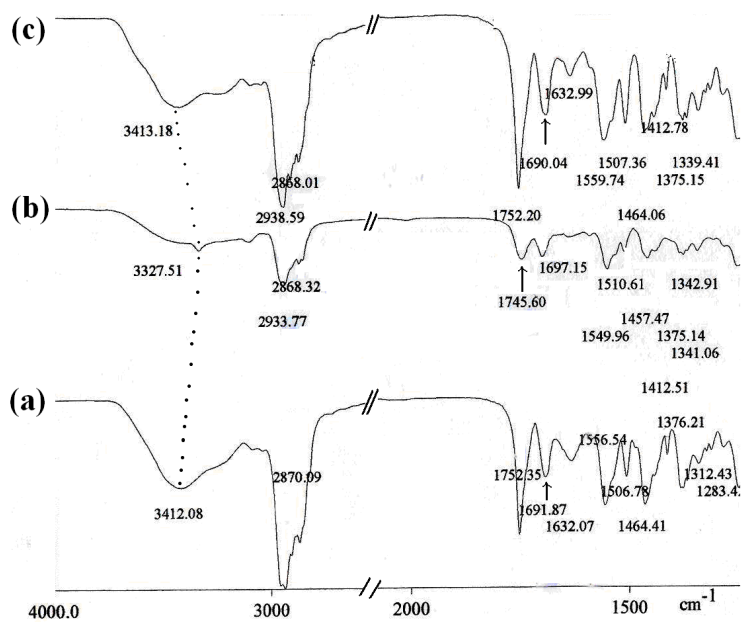

**Figure 10S.** Partial FTIR spectra of (a) **1** (amorphous), (b) **1** (chloroform gel) and (c) **1** with AgClO<sub>4</sub> (sol)

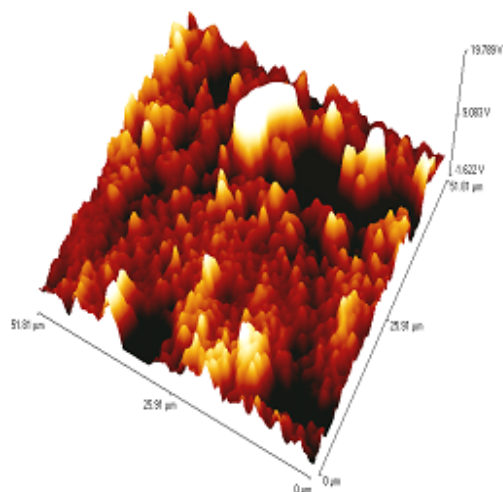

**Figure 11S.** AFM image in three dimension view of xerogel from  $\text{CHCl}_3$  gel of **1** (scale bar: = 50  $\mu\text{m}$ ).

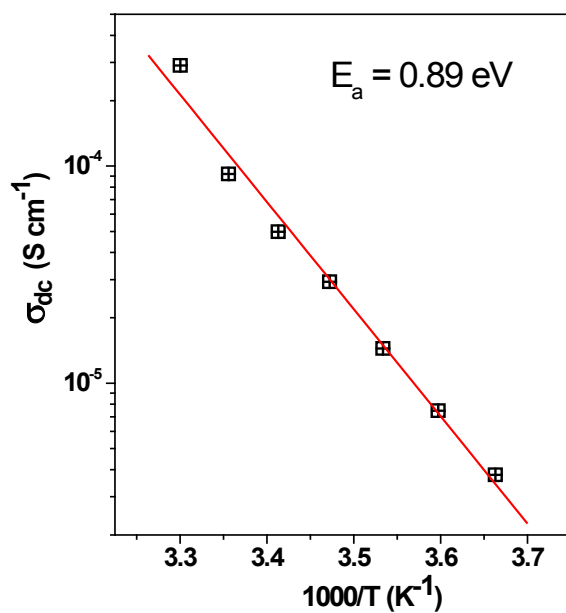

**Figure 12S.** Arrhenius plot of dc conductivity against the reciprocal temperature.



## 6. Experimental

### Chloro-acetic acid 17-(1,5-dimethyl-hexyl)-10,13-dimethyl-2,3,4,7,8,9,10,11,12,13,14,15,16,17-tetradecahydro-1H-cyclopenta[a]phenanthren-3-yl ester (2)<sup>1</sup>

To a stirred solution of cholesterol (0.5 g, 1.29 mmol) in 20 mL dry CH<sub>2</sub>Cl<sub>2</sub> was added chloroacetyl chloride (0.16 mL, 1.93 mmol) and pyridine (0.05 mL, 0.65 mmol) under nitrogenous atmosphere. The mixture was allowed to stir for 10 h at room temperature. After completion of reaction, the solvent was evaporated and the crude was extracted with CHCl<sub>3</sub> (3 × 30 mL). The organic layer was washed several times with water and separated and dried over Na<sub>2</sub>SO<sub>4</sub>. Evaporation of the solvent gave white solid compound. Recrystallization from petroleum ether afforded pure product 2 (0.58 g, yield 96%), mp 148 °C. <sup>1</sup>H NMR (400 MHz, CDCl<sub>3</sub>): δ 5.37 (m, 1H), 4.72 (m, 1H), 4.03 (s, 2H), 2.36 (m, 2H), 2.02–0.85 (m, 38H), 0.67 (s, 3H); FTIR (KBr, cm<sup>-1</sup>): 2939, 2907, 2821, 1753, 1620, 1195.

### *N,N'*-di-pyridin-3-yl-isophthalamide (3)<sup>2</sup>

The symmetrical bis amide 3 was obtained by coupling of 3-aminopyridine (1.2 g, 12.8 mmol) with isophthaloyl diacid chloride (1.3 g, 6.4 mmol) in dry CH<sub>2</sub>Cl<sub>2</sub> followed by addition of triethylamine (1.4 mmol) under nitrogen atmosphere. The reaction mixture was allowed to stir for overnight. After completion of reaction, solvent was removed under vacuum. The residual mass was extracted with CHCl<sub>3</sub>/CH<sub>3</sub>OH mixture (3 x 20 mL). The organic layer was washed with NaHCO<sub>3</sub> solution (3 x 15 mL) and dried over anhydrous Na<sub>2</sub>SO<sub>4</sub>. The solvent was removed and the residual mass was purified by column chromatography over silica gel using 4:1 chloroform: methanol as eluent to afford the desired compound 3 (730 mg, 36% yield, mp 210 °C).

<sup>1</sup>H NMR (d<sub>6</sub>-DMSO, 400 MHz): δ 10.69 (s, 2H, amide NH), 8.96 (d, 2H, *J* = 2 Hz), 8.59 (s, 1H), 8.33 (d, 2H, *J* = 4 Hz), 8.23-8.18 (m, 4H), 7.74 (t, 1H, *J* = 8 Hz), 7.43 (d, 1H, *J* = 8 Hz), 7.42 (d, 1H, *J* = 8 Hz); <sup>13</sup>C NMR (d<sub>6</sub>-DMSO, 125 MHz): δ 166.2, 145.6, 142.9, 136.5, 135.5, 131.8, 129.6, 128.2, 128.0, 124.4; FTIR (KBr) ν cm<sup>-1</sup> : 3418, 3054, 1676, 1613, 1585, 1556, 1481, 1429; Mass (EI): *m/z* 319.1 (M+H)<sup>+</sup>, 225.2, 130.2.

### Compound 1

Compounds 3 (0.20 g, 0.66 mmol) and 2 (0.76 g, 1.65 mmol) were taken in dry CH<sub>3</sub>CN (30 mL) containing 1% DMF and the mixture was refluxed for 3 days. The precipitate appeared was filtered off and washed with hot CH<sub>3</sub>CN followed by diethyl ether to have pure chloride salt 1 in 83% yield (0.68 g, mp 224 °C). <sup>1</sup>H NMR (d<sub>6</sub>-DMSO, 400 MHz): δ 12.42 (s, 2H), 9.84 (s, 2H), 9.29 (d, 2H, *J* = 8 Hz), 8.76 (d, 2H, *J* = 8 Hz), 8.41 (d, 2H, *J* = 8 Hz), 8.39 (s, 1H), 8.31 (t, 1H, *J* = 8 Hz), 8.18 (t, 2H, *J* = 8 Hz), 5.76 (s, 4H), 5.26 (s, 2H), 4.63 (m, 2H), 2.40 – 2.27 (m, 4H), 1.97 – 1.70 (m, 8H), 1.50 – 0.88 (m, 74H); FTIR (KBr) ν cm<sup>-1</sup>: 3412, 1752, 1691; Mass (HRMS): Calcd. 1208.7946 for (M-Cl+1)<sup>+</sup> found 1208.6245 (M-Cl+1)<sup>+</sup>.

### Compound 1a

The dichloride salt 1a (0.2 g, 0.16 mmol) was dissolved in MeOH (8 mL) containing 2% DMF and an aqueous solution of  $\text{NH}_4\text{PF}_6$  (0.05 g, 0.3 mmol) was added under hot condition. After stirring the mixture for 30 min, the precipitate was filtered. Repeated crystallization of the precipitate from diethyl ether afforded pure compound 1a (0.23 g) in 96% yield, mp 196 °C.

$^1\text{H}$  NMR ( $d_6$ -DMSO, 400 MHz):  $\delta$  11.79 (s, 2H), 9.90 (s, 1H), 9.82 (s, 2H), 8.98 (d, 2H,  $J = 8$  Hz), 8.90 (d, 2H,  $J = 8$  Hz), 8.52 (d, 2H,  $J = 8$  Hz), 8.45 (t, 1H,  $J = 8$  Hz), 8.33 (t, 2H,  $J = 8$  Hz), 5.79 (d, 4H,  $J = 8$  Hz), 5.37 (s, 2H), 4.64 (m, 2H), 2.39 – 2.33 (m, 4H), 1.95 – 1.87 (m, 8H), 1.52 – 0.90 (m, 74H);  $^{13}\text{C}$  NMR ( $d_6$ -DMSO, 100 MHz):  $\delta$  166.3, 166.0, 141.9, 139.5, 139.4, 137.6, 136.8, 133.9, 132.4, 129.9, 128.4, 123.0, 76.5, 61.4, 56.5, 56.0, 49.8, 42.3, 37.9, 36.8, 36.5, 36.1, 35.6, 31.8, 28.2, 27.8, 27.6, 24.3, 23.6, 23.1, 22.8, 21.0, 19.4, 19.0 (one carbon in the aromatic region and two carbons in the aliphatic region are unresolved); FTIR (KBr)  $\nu$   $\text{cm}^{-1}$ : 3348, 2936, 1753, 1703; Mass (HRMS): Calcd. 1318.7977 for  $(\text{M} - \text{PF}_6 + 1)^+$  found 1318.6598  $\text{M} - \text{PF}_6 + 1)^+$ .

**Procedure for measurement of ionic conductivity** Measurements of frequency dependent capacitance  $C(\omega)$  and conductance  $G(\omega)$  of the gelatinous system have been done by means of the dielectric spectroscopy technique using Hioki 3532-50 LCR Hi-Tester within the frequency range of 42 Hz–5 MHz and temperature range 273-303 K, in a liquid nitrogen cryostat controlled by an Eurotherm temperature controller. The holder of the sample is a cylinder with steel electrodes separated by  $t = 0.5$  mm. One of the electrodes has a guard ring, in order to have uniform electric field in the central portion of the gel.

# <sup>1</sup>H NMR (d<sub>6</sub>-DMSO, 400 MHz)

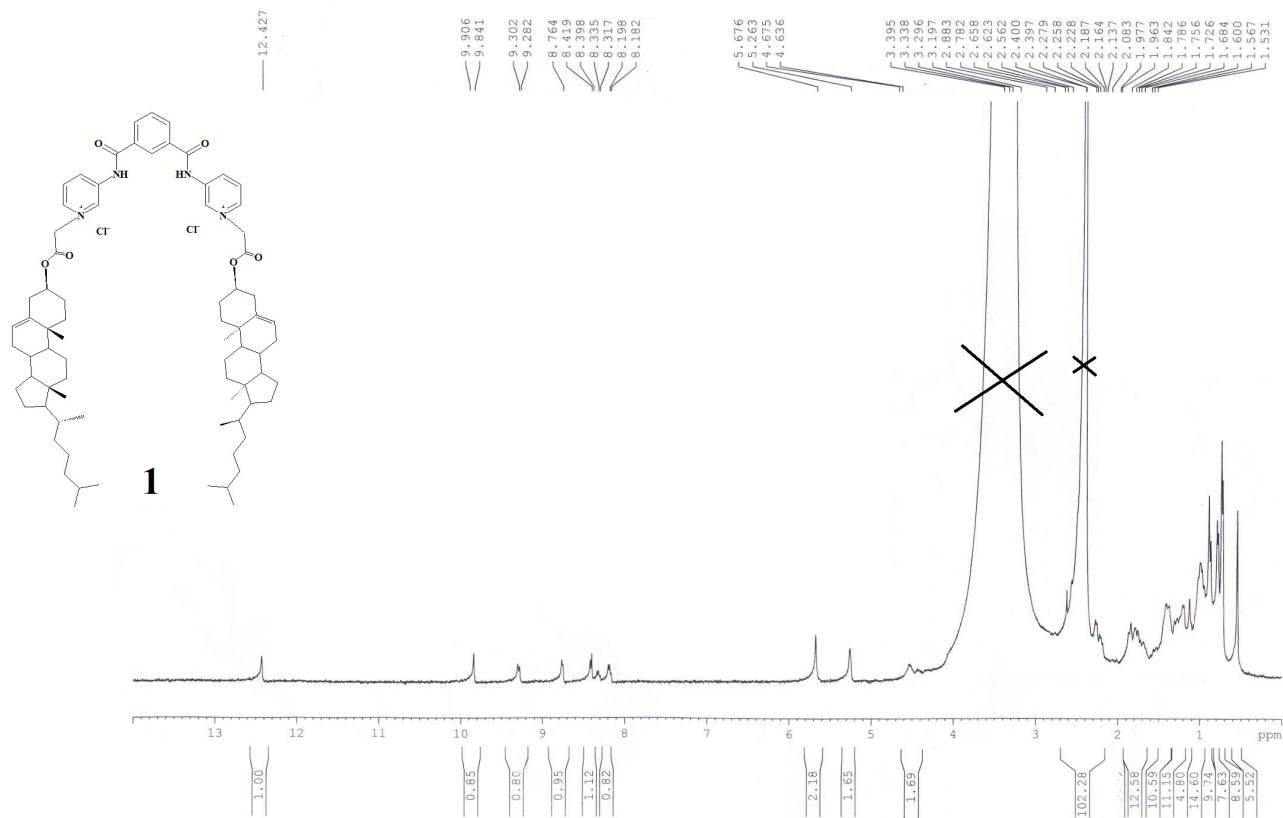

## Mass

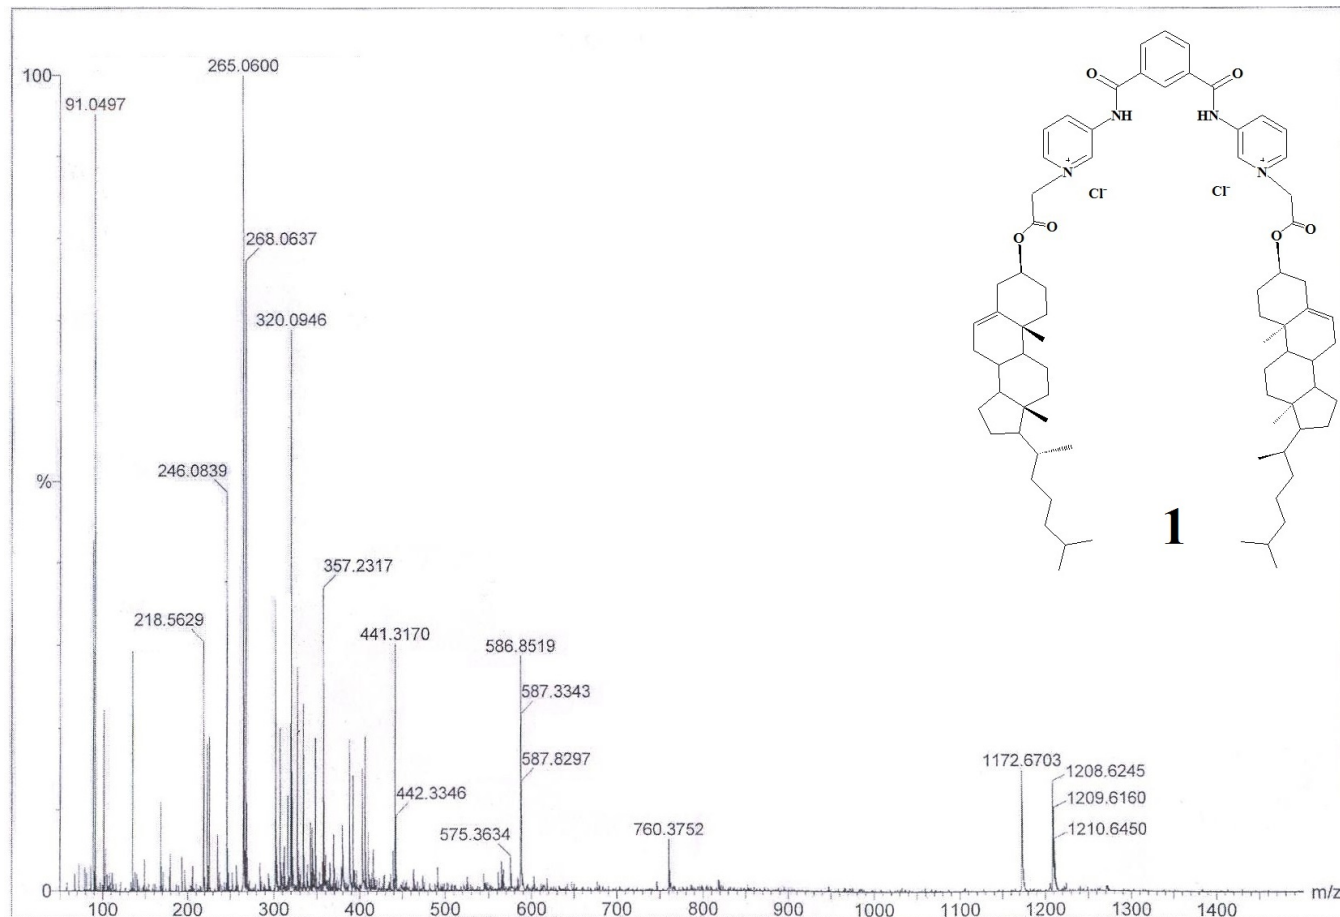

# <sup>1</sup>H NMR (d<sub>6</sub>-DMSO, 400 MHz)

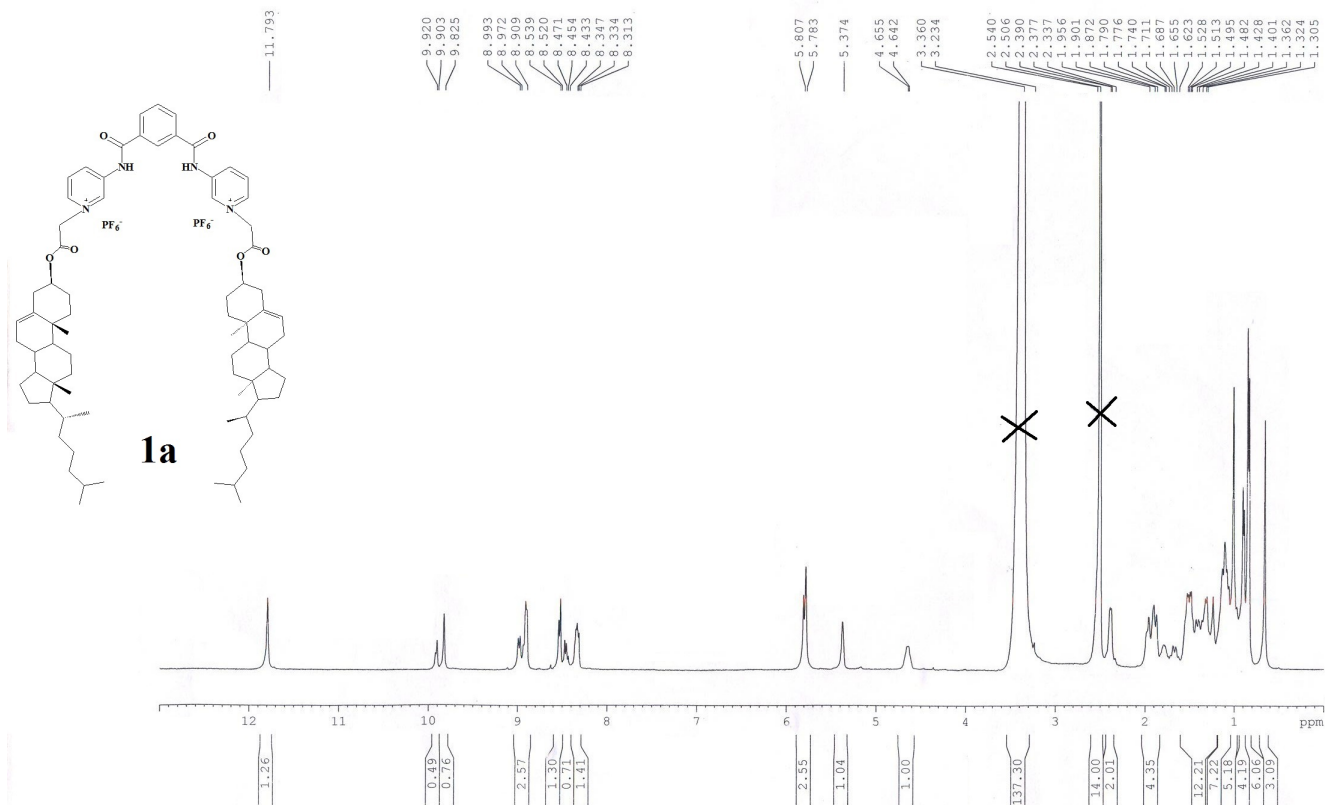

### $^{13}\text{C}$ NMR ( $\text{d}_6\text{-DMSO}$ , 100 MHz)

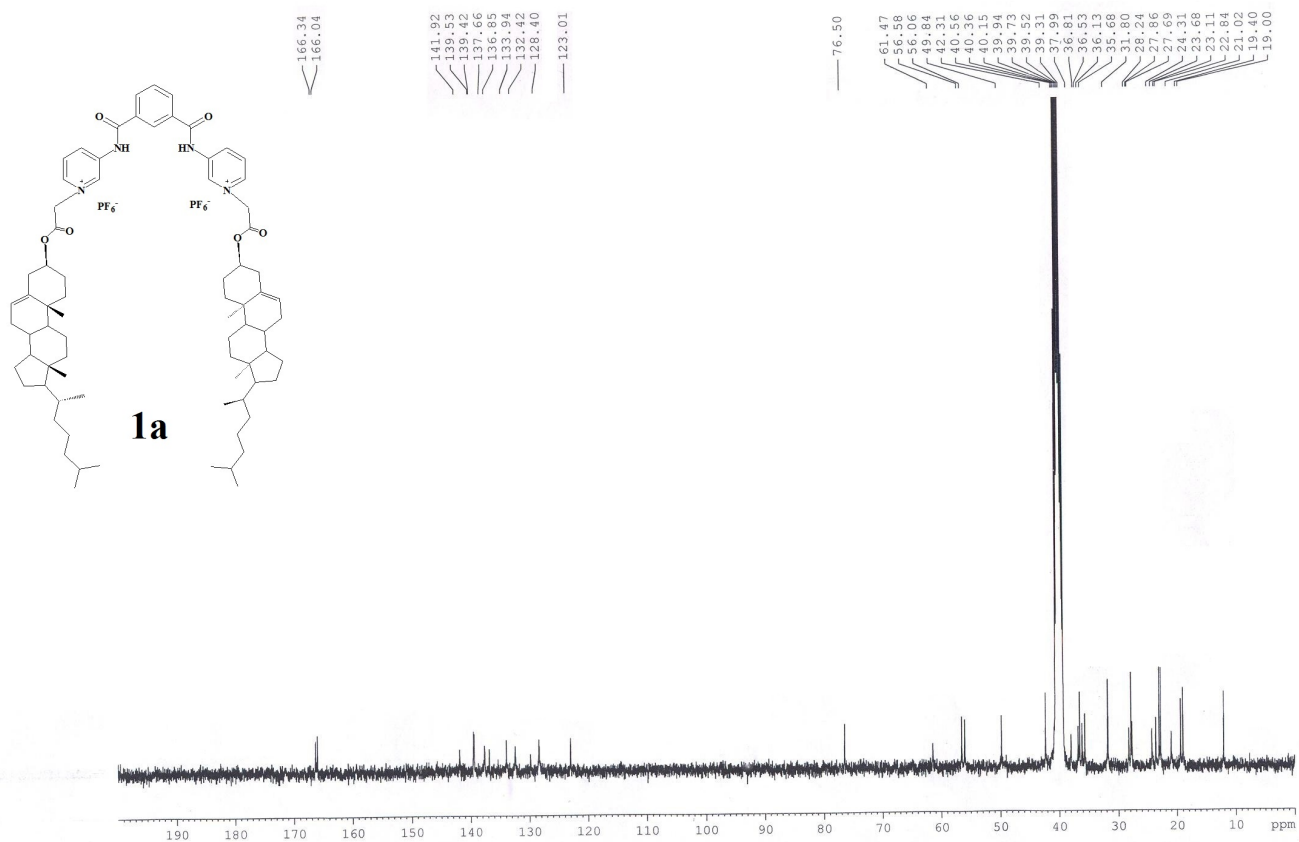

## Mass

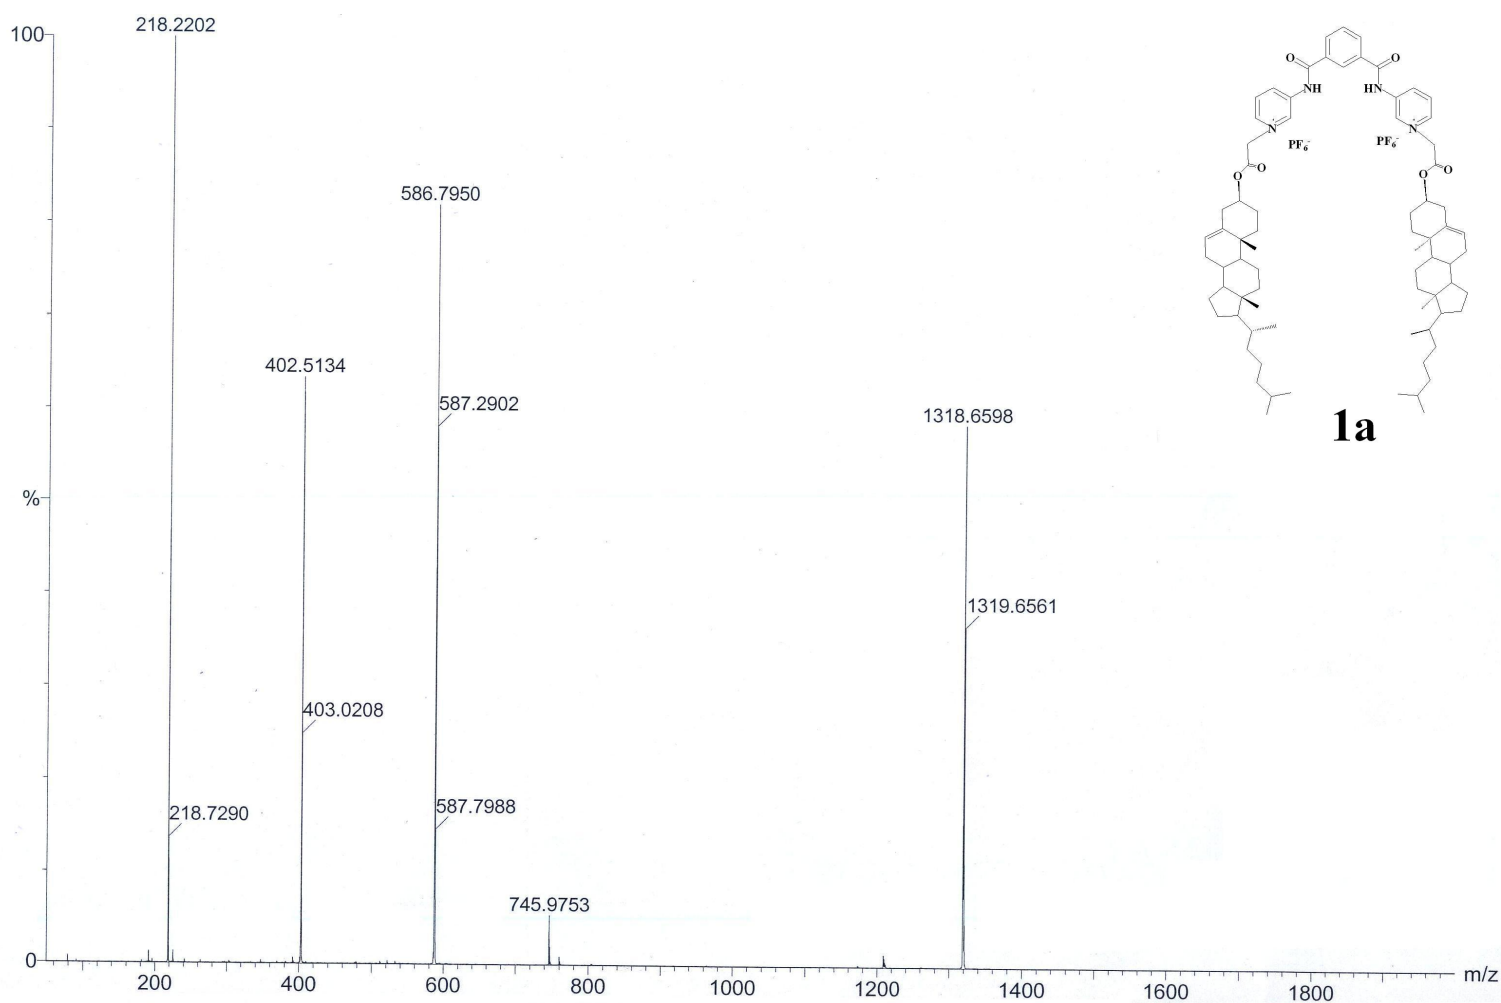

## References

1. K. Ghosh and D. Kar, *Org. Biomol. Chem.*, 2012, **10**, 8800
2. K. Ghosh, A. R. Sarkar and A. P. Chattopadhyay, *Eur. J. Org. Chem.*, 2012, 1311;
